# Supplementary material
Source: Springer Nature journal article supplement (https://www.springermedizin.de/resource/supplementary/13256_2013_2721_MOESM1_ESM.pdf/9651298)

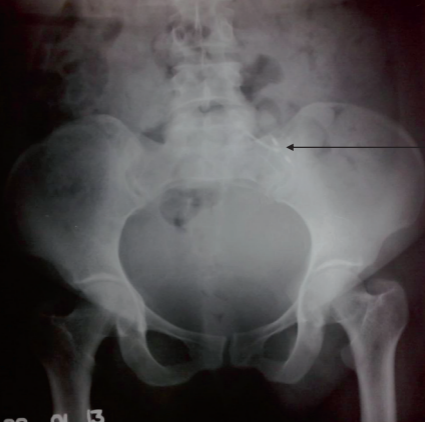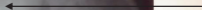

08 01 13

Supplement: MOESM1 [file 9651298]
